# Supplementary material
Source: Research Square preprint supplement (doi:10.21203/rs.3.rs-8968998/v1)
Supplement: Supplementary file 1 [file a35b5873e53d7b5dbcc16778.docx]

**SUPPLEMENTARY INFORMATION OF ARTICLE**

**Domain-agnostic multiplicative stress framework for systemic collapse**

Junwon Lee¹*

*¹ Department of Public Administration, Dankook University, Republic of Korea*

** Corresponding author: Junwon Lee (*[*herrang0311@dankook.ac.kr*](mailto:herrang0311@dankook.ac.kr)*)*

**Supplementary Table 1.** P-limit sensitivity analysis. Separation ratios are analytically invariant to P-limit choice: as P-limits enter as common scaling factors in both crisis and control Π, they cancel exactly in the ratio. This invariance confirms that the discriminative power of the framework depends entirely on the temporal co-movement structure of ρ, Ψ, and Ω, not on normalization parameters.

**Supplementary Table 2.** Variable perturbation robustness. Gaussian noise (10–50% SD) was added to the 2008 case components. Separation varied from 18.4 to 19.2× (baseline 18.6×) with less than 4% deviation.

**Supplementary Table 3.** Nonredundancy verification. Pairwise Pearson correlations during stable periods. Four of the five cases satisfied the condition |r| < 0.7. Supply Chain: r(ρ,Ω) = 0.952.

**Supplementary Table 4.** Channel ablation benchmark. Separation ratios (crisis Π / control Π) for nine stress definitions across five domains. Single-channel: ρ only (2008: 2.6×, Terra–Luna: 1.6×, Fukushima: 1.9×, COVID-19: 647.1×, Supply Chain: 1.8×); Ψ only (5.4×, 1.8×, 2.0×, 2.1×, 11.7×); Ω only (2.1×, 1.9×, 1.8×, 1.7×, 6.3×). Dual-channel: ρ × Ψ (14.4×, 1.8×, 2.1×, 1,703.2×, 5.8×); ρ × Ω (3.2×, 1.7×, 1.9×, 1,346.1×, 2.0×); Ψ × Ω (6.8×, 1.9×, 2.1×, 3.1×, 34.5×). Triple-channel: ρ + Ψ + Ω (2.7×, 1.8×, 1.9×, 11.0×, 7.1×); max(ρ,Ψ,Ω) (2.6×, 1.9×, 1.9×, 17.4×, 8.3×); ρ × Ψ × Ω (18.6×, 1.9×, 2.3×, 3,626.7×, 9.2×). The three-channel multiplicative product achieved the highest separation in four of five domains. In the Supply Chain case, the dual-channel Ψ × Ω (34.5×) outperformed ρ × Ψ × Ω (9.2×), consistent with high ρ–Ω redundancy (r = 0.952).

**Supplementary Table 5.** Time-normalized stress intensity. S̅ = Π/T controls for differing window durations between crisis and control periods, where T = N × τ₀ is the observation-weighted duration (N = number of observations, τ₀ = integration time step). This definition ensures consistency with the Π integral and may differ from calendar duration when observation frequency varies within a window. 2008 Financial: T_crisis = 2.712 yr, T_control = 1.573 yr, Sep(Π) = 18.6×, Sep(S̅) = 10.8×. Terra–Luna: T_crisis = 1.085 yr, T_control = 0.589 yr, Sep(Π) = 1.9×, Sep(S̅) = 1.1×. Fukushima: T_crisis = 0.879 yr, T_control = 0.485 yr, Sep(Π) = 2.3×, Sep(S̅) = 1.2×. COVID-19: T_crisis = 0.575 yr, T_control = 0.408 yr, Sep(Π) = 3,626.7×, Sep(S̅) = 2,573.2×. Supply Chain: T_crisis = 3.917 yr, T_control = 1.417 yr, Sep(Π) = 9.2×, Sep(S̅) = 3.3×. Three of the five cases (2008 Financial, COVID-19, Supply Chain) retained a strong separation after time normalization. The Terra–Luna and Fukushima separation is largely attributable to longer crisis windows.

**Supplementary Table 6.** Failure mode classification sensitivity. Three classification parameters were independently varied: preloaded cutoff (0.70–0.90, baseline 0.80), ductile lead-time cutoff (200–400 d, baseline 300), and onset threshold (5–20% of Π_max, baseline 10%). Terra–Luna (preloaded across all variations) and COVID-19 (brittle across all variations) were fully invariant. The 2008 Financial market (ductile, lead = 396 d) transitions to brittle only when the ductile cutoff exceeds 396 d (at the 400-d threshold). Fukushima (brittle, lead = 226 d) transitions to ductility only when the ductile cutoff is lowered below 226 d (at the 200-d threshold). The supply Chain (ductile, lead = 548 d) transitioned to brittle when the onset threshold was increased to 15% (reducing the effective lead to 242 d). Classifications reflect continuous underlying metrics; boundary cases indicate proximity to thresholds rather than arbitrary categorization.

**Supplementary Table 7.** Sliding-window control analysis. Fixed 180-d windows (6-m for Supply Chain) slid across control periods to generate multiple independent control Π values. 2008 Financial: 14 windows, Sep(Π) mean = 57.6× (95% CI: 41.0×–107.5×), Cohen’s d = 202.8. Terra-Luna: 2 windows, Sep(Π) mean = 2.3× (95% CI: 2.0×–2.7×), Cohen’s d = 6.6. Fukushima: 1 window (control shorter than 180 d), Sep(Π) = 2.3×. COVID-19:1 window (control shorter than 180 d), Sep(Π) = 3,626.7×. Supply Chain: 6 windows, Sep(Π) mean = 3,910.5× (95% CI: 19.3×–17,343.9×), Cohen’s d = 23.9. The wide Supply Chain CI reflects near-zero Π in some control windows. The 2008 case provides the strongest multicontrol validation, with crisis Π exceeding all 14 control windows by at least 41-fold.

**Supplementary Table 8.** Block permutation test. Block permutation was performed with block sizes of B = 5, 10, and 20 d to verify that independent time-index shuffling does not inflate the significance by destroying temporal autocorrelation (B = 2, 3, and 4 m for the Supply Chain; N = 10,000 per configuration). 2008 Financial: independent z = 12.77; block z = 8.78 (B = 5), 7.33 (B = 10), 6.33 (B = 20); all p < 0.001. Terra–Luna: independent z = 5.55; block z = 4.23 (B = 5), 4.23 (B = 10), 3.98 (B = 20); all p < 0.001. Fukushima: independent z = 4.17; block z = 3.82 (B = 5, p = 0.003), 3.56 (B = 10, p = 0.0016), 3.29 (B = 20, p = 0.0025); all p < 0.005. COVID-19: independent z = 17.85; block z = 8.26 (B = 5), 5.87 (B = 10, p = 0.0002), 5.16 (B = 20, p = 0.0007); all p < 0.001. Supply Chain: independent z = 0.36; block z = 0.30 (B = 2), 0.32 (B = 3), 0.31 (B = 4); all p > 0.27, not significant. The same four cases that are significant under independent shuffling remain significant under block permutation for all block sizes tested, confirming that the results are not artifacts of autocorrelation destruction.

Independent z-scores in this table were obtained from the block-permutation pipeline (B = 1) and may differ slightly from Supplementary Table 19 owing to independent random-seed realizations (N = 10,000 each).

**Supplementary Table 9.** Variable substitution robustness (the 2008 Financial case). Each baseline variable was independently replaced with a conceptually similar alternative to FRED, using the same crisis/control date indices (N_crisis = 990, N_control = 574) and an identical normalization procedure. Baseline (DFF |Δ5d| × TEDRATE |Δ5d| × TOTBKCR interpolated): Sep = 18.6×. ρ → DGS2 (2-Y Treasury Yield): Sep = 5.0× (−73.2%). Ψ → VIXCLS (VIX): Sep = 6.4× (−65.7%). Ω → COMPOUT (Commercial Paper Outstanding): Sep = 77.2× (+315.4%). All three substituted (DGS2 × VIXCLS × COMPOUT): Sep = 4.2× (−77.5%). All five configurations maintained crisis–control separation (Sep > 1), confirming their directional robustness. The large quantitative variation reflects genuine differences in how alternative indicators capture the three stress dimensions, and is consistent with the framework’s dependence on the non-redundancy criterion for optimal performance.

**Supplementary Table 10.** Specificity validation using identical variables at different time points. To test whether the framework detects specific stress types instead of generic turbulence, the existing variable sets were applied to additional historical periods without redefinition. 2000 Dot-com Crash (DFF × TEDRATE × TOTBKCR, same series as 2008; raw levels at weekly frequency): stable (1993–1998), control 1996–1998 (N = 154), crisis 1999–2002 (N = 204), Sep = 1.2×. 2019 Repo Near-miss (DFF × TEDRATE × TOTBKCR): Stable (2014–2018), Control 2017–2018 (N = 101), Crisis 2019-01 to 2020-02 (N = 59), Sep = 0.7×. 2011 Thailand Floods (PCEDG |Δ%| × Delivery Time (clip ≥ 0) × WPU3012 |Δ%|, identical transforms to Supply Chain): Stable (2006–2010), Control 2009–2010 (N = 19), Crisis 2011-01 to 2012-06 (N = 18), Sep = 3.5×. The banking credit variables produce a near-unity separation for non-banking events (Dot-com, Repo), confirming domain specificity. The supply chain variables replicate an elevated separation (3.5×) for a second logistics disruption, providing within-domain validation.

**Supplementary Table 11.** Permutation tests for additional validation cases (N = 10,000 per case). 2000 Dot-com: z = 8.44, p < 0.001 (significant). 2019 Repo: z = −2.44, p = 0.993 (not significant). 2011 Thailand: z = −0.17, p = 0.485 (not significant). The Dot-com case achieves statistical significance despite the weak separation (1.2×) because the temporal co-movement of the three channels is nonrandom, even though the magnitudes do not exceed the control levels. The Repo and Thailand cases are not significant: Repo, because the crisis period shows less co-elevation than the control, and Thailand, because of the limited sample size (N = 18 monthly observations).

**Supplementary Table 12.** Nonredundancy verification for additional cases. Pairwise Pearson correlations during stable periods. 2000 Dot-com: r(ρ,Ψ) = 0.576, r(ρ,Ω) = 0.607, r(Ψ,Ω) = 0.765, max|r| = 0.765 (fails |r| < 0.7 criterion). 2019 Repo: r(ρ,Ψ) = 0.267, r(ρ,Ω) = 0.866, r(Ψ,Ω) = 0.547, max|r| = 0.866 (fails). 2011 Thailand: r(ρ,Ψ) = 0.361, r(ρ,Ω) = −0.185, r(Ψ,Ω) = −0.200, max|r| = 0.361 (passes). The two cases that fail nonredundancy (Dot-com, Repo) also exhibit weak separation (1.2× and 0.7×), consistent with the boundary condition identified in the main analysis: multiplicative amplification requires non-redundant channels.

**Supplementary Table 13.** Time-normalized stress intensity for additional cases (T = N × τ₀; see Supplementary Table 5 for definition). For weekly-frequency cases (Dot-com, Repo), τ₀ = 1/365 y per observation; T therefore reflects the number of weekly observations scaled to annual units, not the calendar duration of the window. 2000 Dot-com: T_crisis = 0.559 yr, T_control = 0.422 yr, Sep(Π) = 1.2×, Sep(S̅) = 0.9×. 2019 Repo: T_crisis = 0.162 yr, T_control = 0.277 yr, Sep(Π) = 0.7×, Sep(S̅) = 1.2×. 2011 Thailand: T_crisis = 1.500 yr, T_control = 1.583 yr, Sep(Π) = 3.5×, Sep(S̅) = 3.7×. Thailand retained separation after time normalization (3.7×), indicating a genuine stress elevation instead of a window-length artifact. The Dot-com and Repo results are consistent with the specificity interpretation: banking credit variables do not detect nonbanking stress, regardless of the normalization method.

**Supplementary Table 14.** Transform window sensitivity for the 2008 Financial case. The baseline pipeline uses |Δ5d| (k = 5 business days) for ρ and Ψ transforms. This table reports Sep(Π) and permutation test results for k = 1, 3, 5, 10, and 20 d, with all other settings held constant. k = 1: Sep(Π) = 17.0×, Sep(S̅) = 9.9×, z = 18.43, p < 0.001. k = 3: Sep(Π) = 17.3×, Sep(S̅) = 10.1×, z = 14.30, p < 0.001. k = 5 (baseline): Sep(Π) = 17.9×, Sep(S̅) = 10.4×, z = 13.72, p < 0.001. k = 10: Sep(Π) = 21.1×, Sep(S̅) = 12.2×, z = 15.21, p < 0.001. k = 20: Sep(Π) = 16.6×, Sep(S̅) = 9.4×, z = 13.91, p < 0.001. Sep(Π) ranges from 16.6× to 21.1× across all tested values of k, confirming that the crisis–control separation is robust to the transform window choice. Baseline k = 5 yields a mid-range separation, indicating that the business-week convention does not favor the reported result.

Caption Note: The observation counts (N_crisis = 1,045; N_control = 608) differ from Table 2 because the sensitivity analysis extends the evaluation window to accommodate larger transform sizes; the baseline separation (18.6×) in Table 2 reflects the narrower, case-specific window defined in Supplementary Table 18.

**Supplementary Table 15.** Matched pipeline specificity tests for additional cases. The Dot-com and Repo cases are re-analyzed using the identical pipeline as the 2008 Financial case (|Δ5d| transforms, daily TOTBKCR interpolation, τ₀ = 1/365). 2000 Dot-com (matched pipeline): N_crisis = 978, N_control = 739, Sep(Π) = 1.3×, Sep(S̅) = 1.0×, z = 9.47, p < 0.001. 2019 Repo (matched pipeline): N_crisis = 285, N_control = 491, Sep(Π) = 0.8×, Sep(S̅) = 1.3×, z = 3.11, p = 0.001. For comparison, Dot-com (raw weekly): Sep(Π) = 1.2×; Repo (raw weekly): Sep(Π) = 0.7×; 2008 Financial (baseline): Sep(Π) = 18.6×. Even with an identical pipeline, the Dot-com and Repo separations remain near unity (1.3× and 0.8×, respectively), whereas the 2008 case achieves 18.6×, a 14-fold difference. This confirms that the 2008 Financial separation reflects genuine banking-credit stress detection and not a pipeline artifact, and that the banking-credit variables do not flag non-banking financial stress regardless of preprocessing choices.

**Supplementary Table 16**. Head-to-head comparison with existing crisis detection methods. Six methods were applied to identical crisis and control data across all five cases: multiplicative Π (ρ × Ψ × Ω), critical slowing down rolling variance (CSD Variance), critical slowing down lag-1 autocorrelation (CSD AC(1)), first principal component (PCA-PC1), additive aggregation (ρ + Ψ + Ω), and channel maximum (max(ρ,Ψ,Ω)). The rolling windows for the CSD indicators were set to one-fifth the length of each series. PCA was computed on the three normalized channels, with the first component integrated over time. Separation ratios (crisis/control): 2008 Financial: Π = 18.6×, CSD Variance = 12.1×, CSD AC(1) = 1.1×, PCA-PC1 = 6.5×, Additive = 2.7×, Max = 2.6×. Terra-Luna: Π = 1.9×, CSD Variance = 1.3×, CSD AC(1) = 1.1×, PCA-PC1 = 1.8×, Additive = 1.8×, Max = 1.9×. Fukushima: Π = 2.3×, CSD Variance = 1.8×, CSD AC(1) = 1.2×, PCA-PC1 = 2.0×, Additive = 1.9×, Max = 1.9×. COVID-19: Π = 3,626.7×, CSD Variance = 9,674.5×, CSD AC(1) = 1.1×, PCA-PC1 = 439.3×, Additive = 11.0×, Max = 17.4×. Supply Chain: Π = 9.2×, CSD Variance = 4.8×, CSD AC(1) = −1.1×, PCA-PC1 = 10.2×, Additive = 7.1×, Max = 8.3×. The multiplicative Π achieved the highest separation in three of five cases (2008, Terra–Luna, Fukushima). The CSD variance outperformed the COVID-19 case, where the multiplicative floor effect (near-zero control baseline) amplified both methods. PCA-PC1 narrowly outperformed the other methods in the Supply Chain case (10.2× vs 9.2×), consistent with ρ – Ω redundancy.

CSD autocorrelation, which is a canonical early warning signal, produces near-unity separation in four of five domains; the Supply Chain case yields a negative ratio (−1.1×) owing to sign reversal in control-period lag-1 autocorrelation.

**Supplementary Table 17**. Pseudo-prospective signal analysis. Rolling mean stress S̅(t) was computed for each case using an expanding window, with alert thresholds set to 2σ and 3σ above the control-period mean stress. Rolling window sizes: 90 d (2008 Financial), 30 d (Terra–Luna, Fukushima, COVID-19), and 3 m (Supply Chain). 2008 Financial: collapse = 2008-09-15; control mean stress = 0.043; 2σ threshold = 0.207; first 2σ exceedance = 2007-08-14; lead = 398 d (13 m); signal type = Precollapse. Terra–Luna: collapse = 2022-05-09; first 2σ = N/A; signal type = No signal (rolling stress never exceeded threshold before collapse). Fukushima: collapse = 2011-03-11; first 2σ = 2011-03-18; signal type = Post-collapse (exogenous seismic trigger). COVID-19: collapse = 2020-03-23; first 2σ = 2020-02-05; lead = 47 d; signal type = Precollapse. Supply Chain: collapse = 2021-10-01; first 2σ = 2021-03-01; lead = 214 d (7 m); signal type = Precollapse. Three of the five cases produced precollapse signals, and all three corresponded to ductile or late brittle failure modes. The two cases without a precollapse signal (Terra–Luna and Fukushima) corresponded to the preloaded and exogenous-trigger failure modes, respectively. This alignment between the signal lead-time and failure mode classification provided an independent validation of the taxonomy.

**Supplementary Table 18.** Window definitions for all cases. Three temporally ordered windows were defined for each case: stable (P-limit calibration only; no Π computed), control (noncrisis comparison), and crisis (stress episode). Windows may overlap as described in the Methods section. 2008 Financial: Stable 2004-01 to 2006-12; Control 2004-01-09 to 2006-06-30 (N = 574 d); Crisis 2005-01-05 to 2009-03-31 (N = 990 d); Stable–Control overlap (control period is itself stable); Control is a subset of Crisis. Terra–Luna: Stable 2021-01 to 2021-12; Control 2021-07-01 to 2022-01-31 (N = 215 d); Crisis 2021-07-01 to 2022-07-31 (N = 396 d). Control is a subset of Crisis. Fukushima: Stable 2009-01 to 2010-12; Control 2010-06-08 to 2011-02-28 (N = 177 d); Crisis 2010-06-08 to 2011-09-29 (N = 321 d). Control is a subset of Crisis. COVID-19: Stable 2018-01 to 2019-12; Control 2019-07-01 to 2020-01-31 (N = 149 d); Crisis 2019-07-01 to 2020-04-29 (N = 210 d); Control is a subset of Crisis. Supply Chain: Stable from 2015-01 to 2019-12; Control from 2019-02 to 2020-06 (N = 17 m); Crisis from 2019-02 to 2022-12 (N = 47 m); Control is a subset of crisis. In all cases, the stable window preceded the crisis episode, ensuring no look-ahead bias in the P-limit calibration.

**Supplementary Table 19.** Permutation test results (N = 10,000 per case). Fisher combined p = 1.66 × 10⁻¹¹.

| Case | N | z-score | p-value | Significant |
| --- | --- | --- | --- | --- |
| 2008 Financial | 990 | 12.77 | <0.001 | *** |
| Terra-Luna | 396 | 5.49 | <0.001 | *** |
| Fukushima | 321 | 4.16 | 0.0008 | *** |
| COVID-19 | 210 | 17.98 | <0.001 | *** |
| Supply Chain | 47 | 0.37 | 0.262 | n.s. |

**Supplementary Table 20.** Failure mode classification based on Π accumulation at collapse and temporal lead time.

| **Case** | **Π@collapse / Π_max** | **Lead (days)** | **Mode** | **Analogy** |
| --- | --- | --- | --- | --- |
| 2008 Financial | 49.9% | 396 | Ductile | Metal fatigue |
| Terra-Luna | 93.3% | 230 | Pre-loaded | Creep rupture |
| Fukushima | 45.9% | 226 | Brittle | Glass fracture |
| COVID-19 | 10.3% | 0 | Brittle | Glass fracture |
| Supply Chain | 65.7% | 548 | Ductile | Metal fatigue |

**Supplementary Note 1.**

**Information-theoretic derivation of the multiplicative formulation.**

Let X₁(t), X₂(t), X₃(t) denote the P-limit-normalized channel values ρ̂(t), Ψ̂(t), and Ω̂(t) at time t. By construction, Xᵢ(t) ≈ 1 corresponds to the 99th percentile of channel i during the stable reference period, so Pr(Xᵢ > 1) ≈ 0.01 under stable-period conditions.

**Proposition.** If X₁, X₂, X₃ are stochastically independent and each marginal survivor function S̄ᵢ(x) = Pr(Xᵢ > x) is strictly decreasing, then the Shannon surprise of simultaneous exceedance, I(x₁, x₂, x₃) = −log Pr(X₁ > x₁, X₂ > x₂, X₃ > x₃), decomposes as I = ∑ᵢ gᵢ(xᵢ), where gᵢ(x) = −log S̄ᵢ(x) ≥ 0 is strictly increasing. The product g₁ · g₂ · g₃ is monotone increasing in each argument and serves as an exact joint-surprise statistic. The raw-magnitude product x₁ · x₂ · x₃ is a monotone proxy for g₁ · g₂ · g₃ (as each gᵢ is monotone increasing in xᵢ), though the two products are exactly proportional only when the gᵢ are linear in xᵢ (i.e., exponential-tailed marginals). For heavier or lighter tails, the raw product preserves the ordering of co-exceedance events but not their relative magnitudes.

***Proof.*** Independence implies Pr(X₁ > x₁, X₂ > x₂, X₃ > x₃) = ∏ᵢ S̄ᵢ(xᵢ). Taking −log: I = ∑ᵢ gᵢ(xᵢ) where gᵢ = −log S̄ᵢ ≥ 0 is strictly increasing. Consider the product G = g₁ · g₂ · g₃. As each factor is non-negative and increasing in its argument, G is monotone increasing in each xᵢ; moreover, G = 0 if and only if at least one channel is at or below its baseline (gᵢ = 0), capturing the coincidence-filter property. Now, as each gᵢ is a strictly increasing function of xᵢ, the raw product P = x₁ · x₂ · x₃ preserves the partial ordering: if (x₁, x₂, x₃) ≥ (x₁′, x₂′, x₃′) componentwise, then G ≥ G′ and P ≥ P′. For exponential-tailed marginals, gᵢ ∝ xᵢ and P ∝ G exactly. For general tail shapes, P and G rank events identically along any monotone path in (x₁, x₂, x₃)-space, though their ratio is not constant.

**Corollary (redundancy penalty).** When channels are positively correlated, the true joint survivor function satisfies Pr(X₁ > x₁, X₂ > x₂) > S̄₁(x₁) · S̄₂(x₂) (positive dependence increases joint tail probability). The product ∏ᵢ xᵢ therefore overstates the surprise of co-exceedance relative to the true dependence structure. This inflates the baseline (stable period) stress product, reducing the crisis-to-control separation ratio. The empirical consequence is observed in the Supply Chain case: channels ρ and Ω share r = 0.952, the three-channel product (Sep = 9.2×) is outperformed by the two-channel Ψ × Ω product (34.5×), and the permutation test fails to reach significance. Thus, the nonredundancy criterion (max|r| < 0.7) is not merely an empirical heuristic, but a necessary condition for the factorization that underlies the multiplicative formulation.

**Remark.** The derivation requires only (i) channel independence during the reference period, (ii) continuous marginal distributions with strictly decreasing survivor functions, and (iii) the monotonicity of the transformation from magnitude to exceedance probability. No distributional assumptions (Gaussian and Pareto) were required. Therefore, the multiplicative form is distribution-free within this class of monotonicity. The cumulative integral Π(t) = ∫ S(t′) dt′ / τ₀ then accumulates surprise over time, measuring total information content of the co-exceedance history.
